# Supplementary material
Source: PubMed Central journal article supplement (PMC7097903)
Supplement: ao9b02833_si_001.pdf [file ao9b02833_si_001.pdf]

## Supporting Information

### **Highly efficient gold nano-flowered optical biosensor doped in sol-gel/PEG matrix for the determination of calcitonin biomarker in different serum samples**

**Walaa. E. Omer<sup>1</sup>, Maged A. El-Kemary<sup>1</sup>, Mostafa M. Elsaady<sup>2</sup>, Mona N. Abou-Omar<sup>3</sup>, Ahmed O. Youssef<sup>2</sup>, Ali A. Sayqal<sup>4</sup>, Ayman A. Gouda<sup>5</sup>, Mohamed S. Attia<sup>2\*</sup>**

<sup>1</sup>Institute of Nanoscience and Nanotechnology, Kafrelsheikh University, 33516 Egypt. <sup>2</sup>Department of Chemistry, Faculty of Science, Ain Shams University, 11566, Cairo, Egypt.

<sup>3</sup>Department of Chemistry, Faculty of Women for Arts, Science and Education, Ain Shams University, Cairo, Egypt.

<sup>4</sup>Chemistry Department, Faculty of Applied Sciences, Umm Al-Qura University, Makkah, Saudi Arabia.

<sup>5</sup>Faculty of Public Health and Health Informatics, Umm Al-Qura University, Makkah, Saudi Arabia.

Corresponding author: (M. S. Attia) [Mohamed\\_sam@yahoo.com](mailto:Mohamed_sam@yahoo.com),

[mohd\\_mostafa@sci.asu.edu.eg](mailto:mohd_mostafa@sci.asu.edu.eg), Tel: +(202) 1229867311, +(202) 1060818922

S1

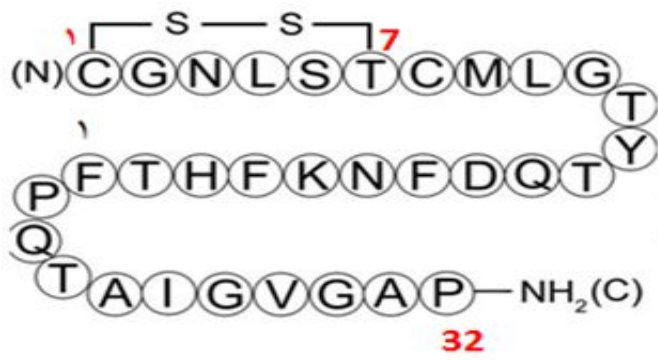

Figure S.1. Structure of calcitonin

S2

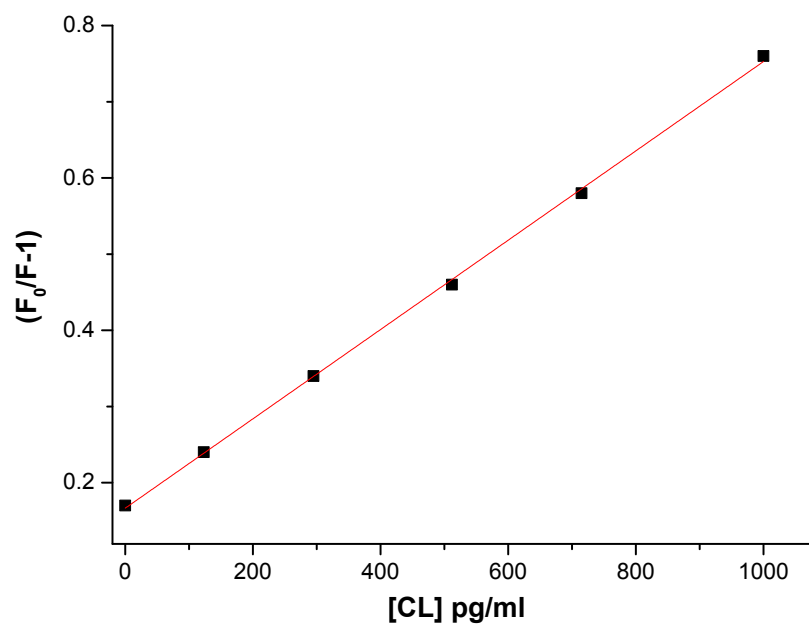

Figure S2. Stern-Volmer plot.

S3

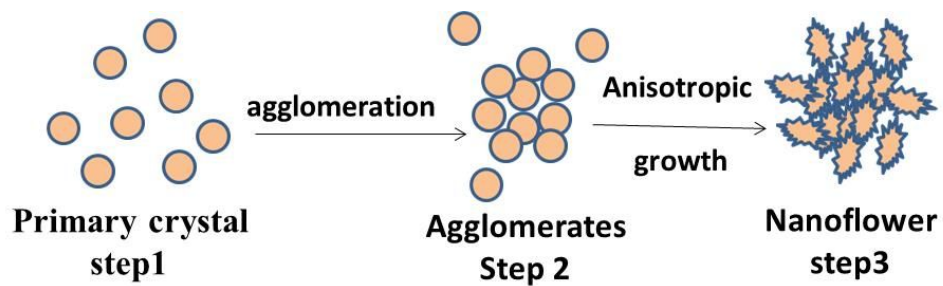

Figure S3. Mechanism of AuNFs formation in HEPES

S4

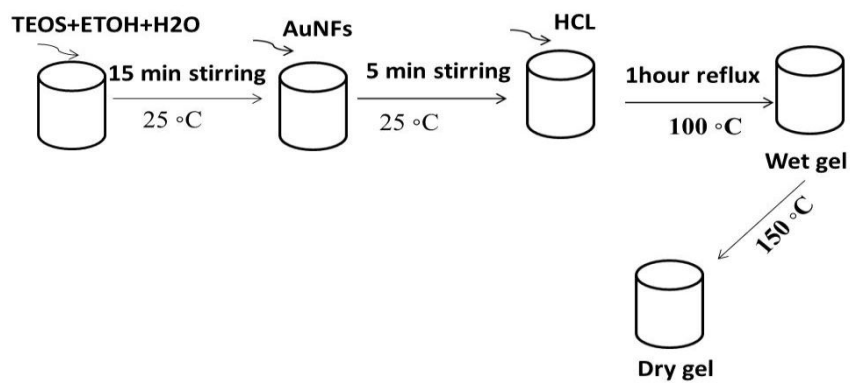

Figure S4. Mechanism of synthesis of Au doped in sol gel

Table S1. Sensitivity and regression parameters for the proposed method

| <b>Parameter</b>                     | <b>Values</b> |
|--------------------------------------|---------------|
| $\lambda_{em}$ (nm)                  | 360           |
| Linear range, pg/mL                  | 0.01 -1000    |
| Limit of detection (LOD), pg/mL      | 0.707         |
| Limit of quantification (LOQ), pg/mL | 2.14          |
| Intercept (a) $\times 10^{-4}$       | 5.80          |
| Slope (b)                            | 0.16          |
| Standard deviation                   | 0.03          |
| Regression coefficient (r)           | 0.99          |
